# Supplementary material for: Organic Selenium induces ferroptosis in pancreatic cancer cells
Source: PubMed Central journal article supplement — Redox Biol. 2023 Nov 20;68:102962. doi: 10.1016/j.redox.2023.102962 (PMC10698006; doi:10.1016/j.redox.2023.102962), 2023-11-20
Supplement: mmc1.pdf [file mmc1.pdf]

# Suppl. Figure 1

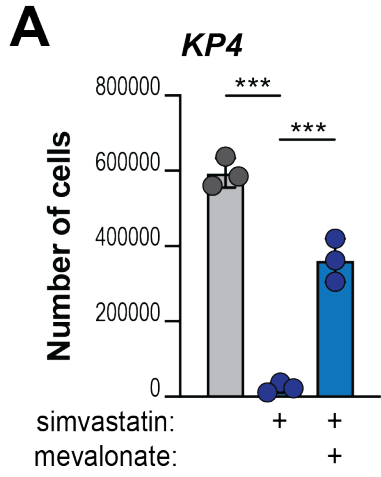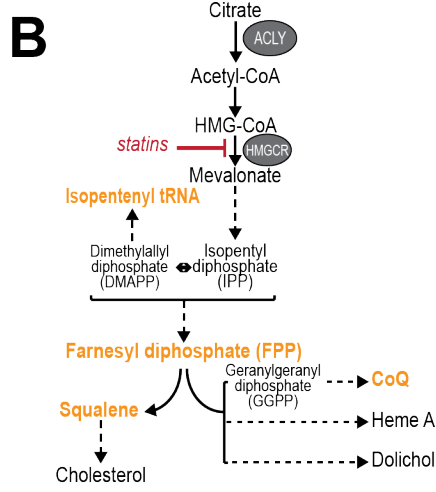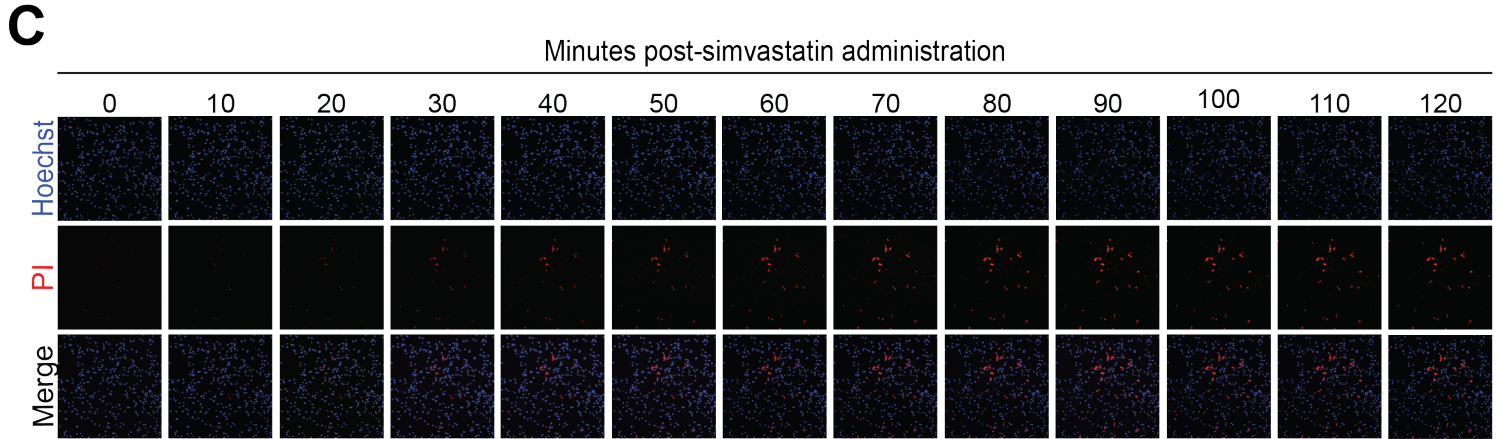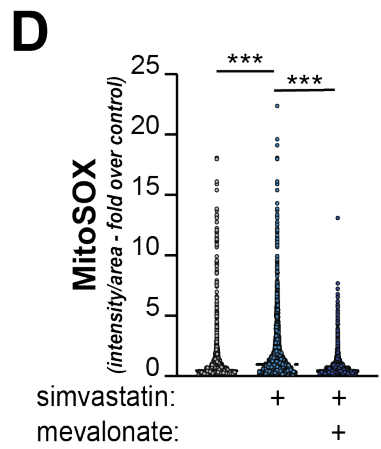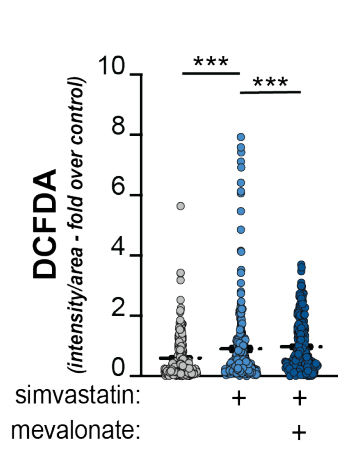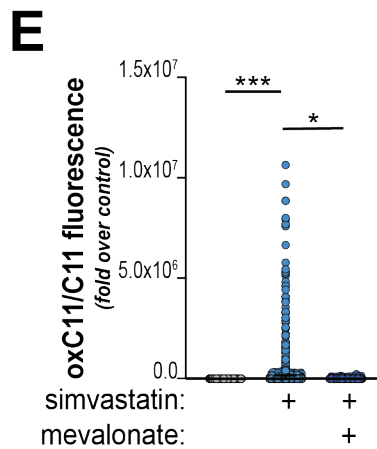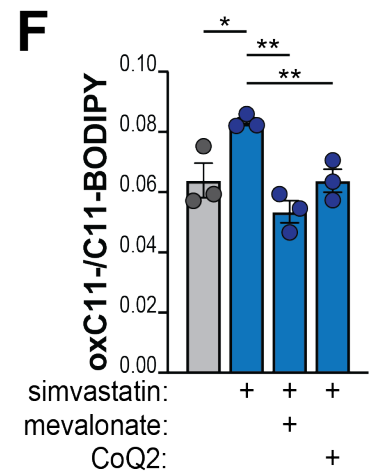

**Supplementary Figure 1. A**, KP4 cells were treated with simvastatin (20  $\mu$ M) w/ or w/o supplementation with mevalonate (500  $\mu$ M) and counted after 3 days. In **B**, schematic representation of the MVP. Redox-active intermediates are highlighted in orange. In red, statins inhibit 3-hydroxy-3-methyl-glutaryl-CoA reductase (HMGCR). **C**, Time course analysis of simvastatin-induced death. Before acquisition, cells were switched to propidium iodide (PI)-containing medium. Simvastatin was added at t=0, and images acquired at indicated time points. Pictures show same field over time (split channels and merge). **D**, Quantification of DCDFDA and MitoSOX staining shown in Figure 1A. **E**, quantification of oxidized (green) and reduced (red) C11-BODIPY shown in Figure 1D. **F**, KP4 cells were treated with simvastatin (20  $\mu$ M) w/ or w/o supplementation with mevalonate (500  $\mu$ M), Coenzyme Q2 (15  $\mu$ M) for 2 hours. Flow cytometry analysis was performed 50 minutes after the addition of C11-BODIPY. For **A**, **F**, bars show mean  $\pm$  SD. For **D**, **E**, bars show mean,  $\pm$  95% CI. For all panels: \*, P < 0.05; \*\*, P < 0.01; \*\*\*, P < 0.001; calculated over vehicle-treated cells unless otherwise indicated.

# Suppl. Figure 2

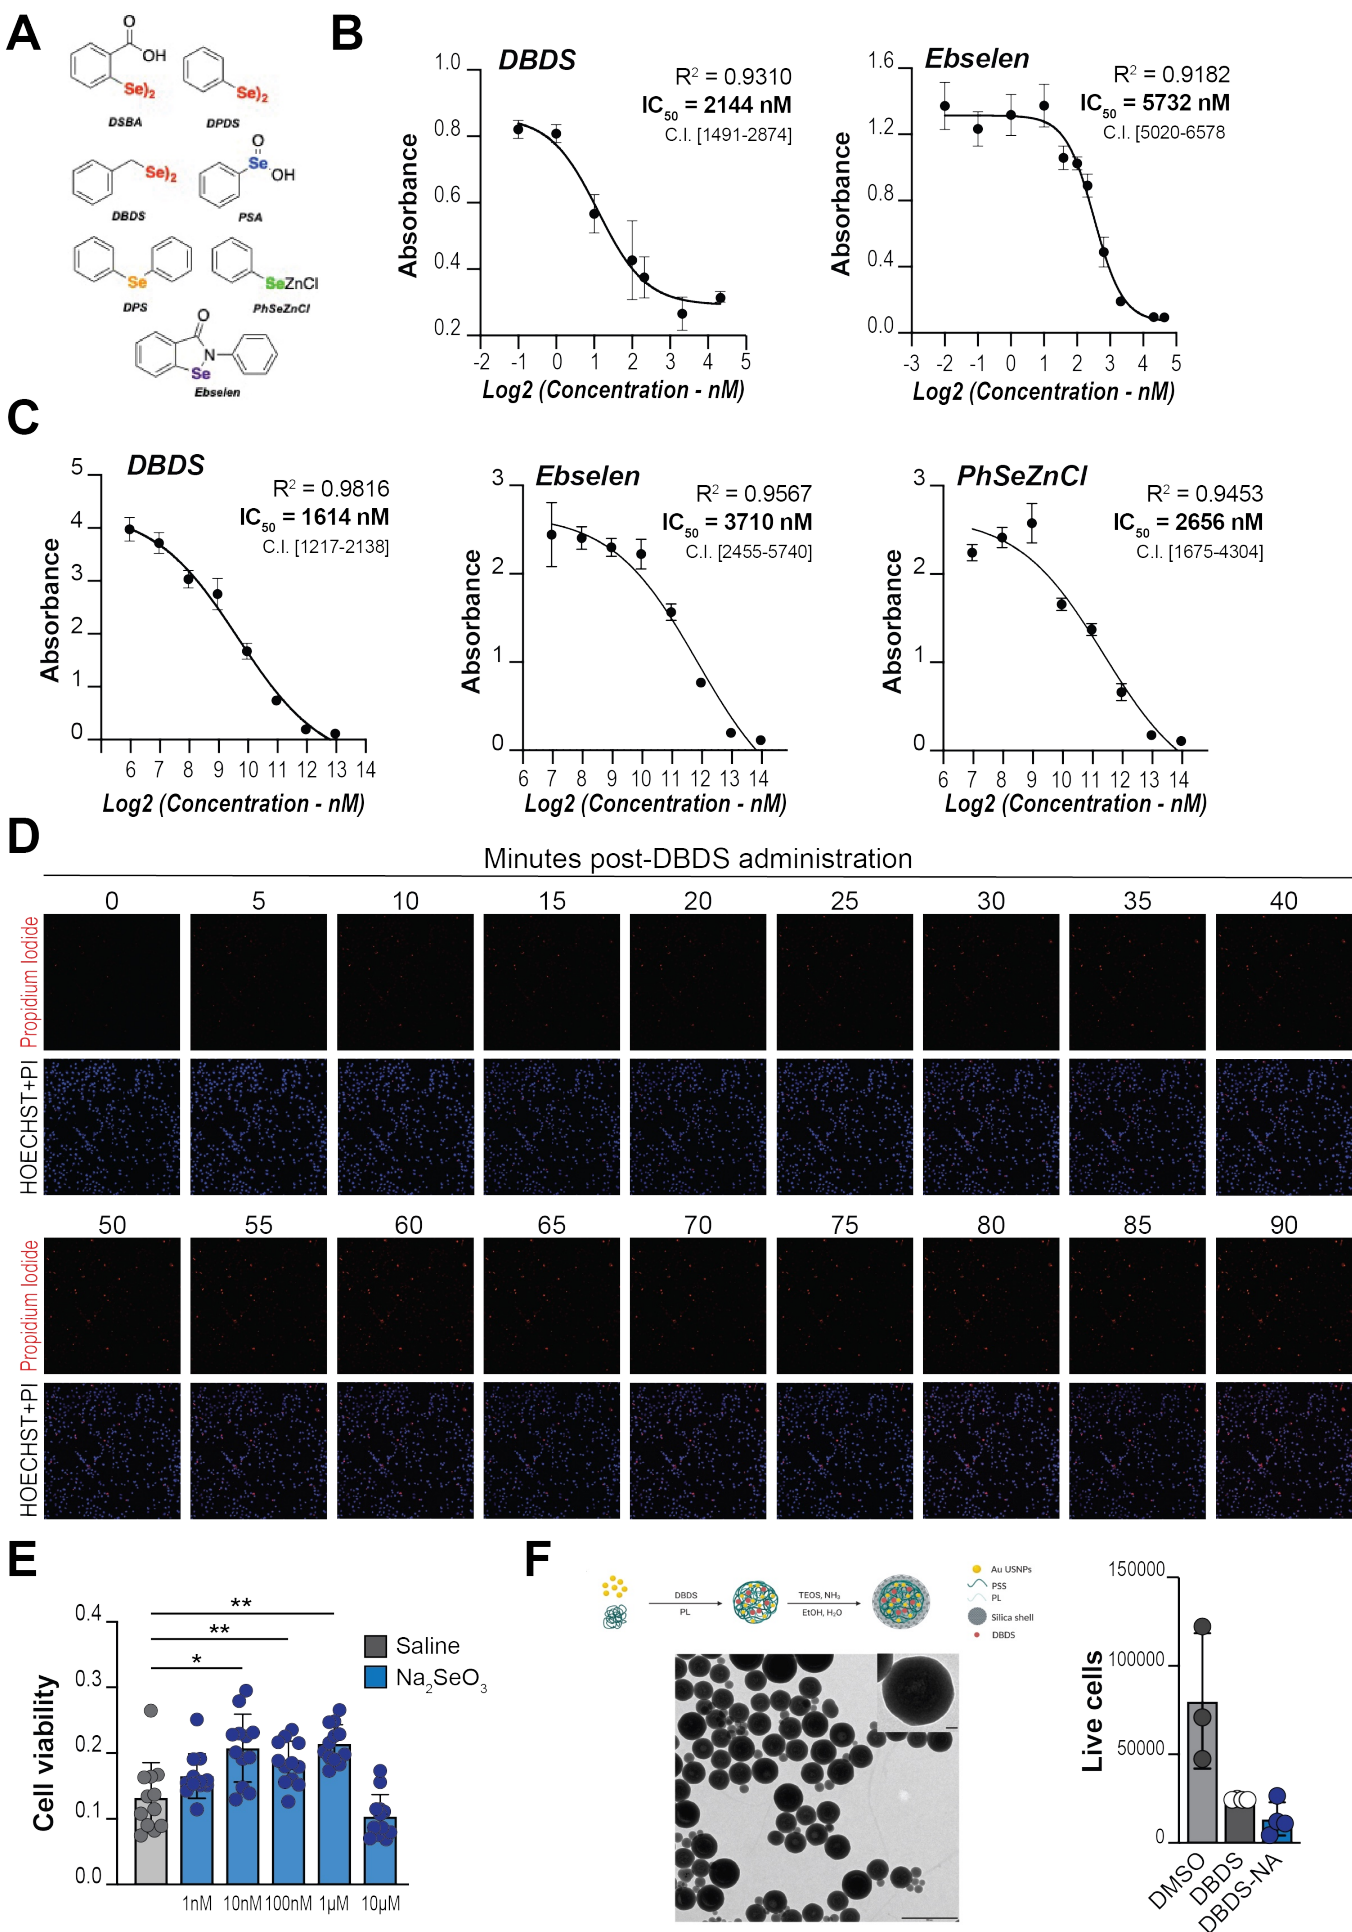

**Supplementary Figure 2. A**, structure of seleno compounds screened. **B-C**, KPC (**B**) or Panc1 (**C**) cells were treated with increasing concentrations of indicated compounds for 2 days and stained with Crystal Violet. Graphs show dose/response effect on cell viability (quantified by solubilization of Crystal Violet). Inhibitory concentration 50 (IC50), the coefficient of determination ( $R^2$ ) and confidence interval (C.I.) are indicated in each plot. **D**, Time course analysis of DBDS-induced death. Before acquisition, cells were switched to propidium iodide (PI)-containing medium. DBDS was added at  $t=0$ , and images acquired at indicated time points. Pictures show same field over time (split channels and merge). **E**, Panc1 cells were administered increasing concentrations of sodium selenite and their viability quantified after 2 days. Dots denote experimental replicates. Bars show mean,  $\pm$  SD (\*,  $P < 0.05$ ; \*\*,  $P < 0.01$ ; \*\*\*,  $P < 0.001$ ). **F**, Schematic representation of DBDS-NAs synthetic protocol. Gold ultrasmall nanoparticles and DBDS are embedded in a polymeric matrix then surrounded by a silica shell. Magnified are transmission electron microscopy (TEM) images of DBDS-NAs. Scale bar: 500 nm. The inset zooms on a single DBDS-NA. Scale bar: 40 nm. On the far right, cell count of cells shown in Figure 2D.

# Suppl. Figure 3

## A

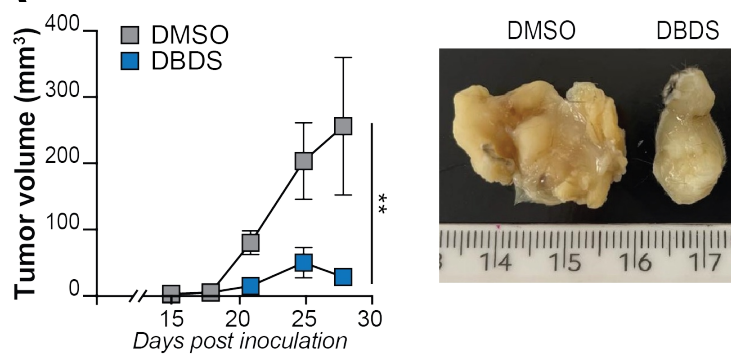

## B

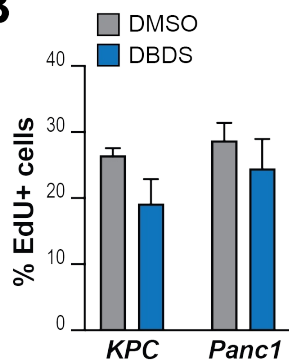

## C

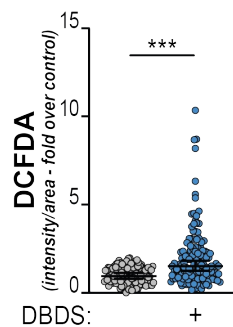

## D

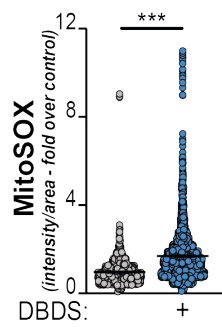

**Supplementary Figure 3. A,** Growth of KPCY-derived tumor cell clones (6419c5;  $n=6$  mice/group) implanted subcutaneously into immune-competent C57BL/6J mice and treated with either DBDS (1 mg/kg) or vehicle (DMSO 1%), three times per week after tumors became palpable (day 15 after inoculation). On the right, representative images of tumor masses. **B,** Indicated cell lines were treated with DBDS (10  $\mu$ M) or vehicle (DMSO 1%) for 24 hours and then pulsed with EdU for 1 hour. After staining, EdU-positive cells (% of DAPI-stained nuclei) were imaged and manually quantified. **C-D,** quantification of images in Figure 3D-E. Each dot denotes a cell; bars indicate mean,  $\pm$  95% CI. For all panels: \*,  $P < 0.05$ ; \*\*,  $P < 0.01$ ; \*\*\*,  $P < 0.001$ ; calculated over vehicle-treated cells unless otherwise indicated.

# Suppl. Figure 4

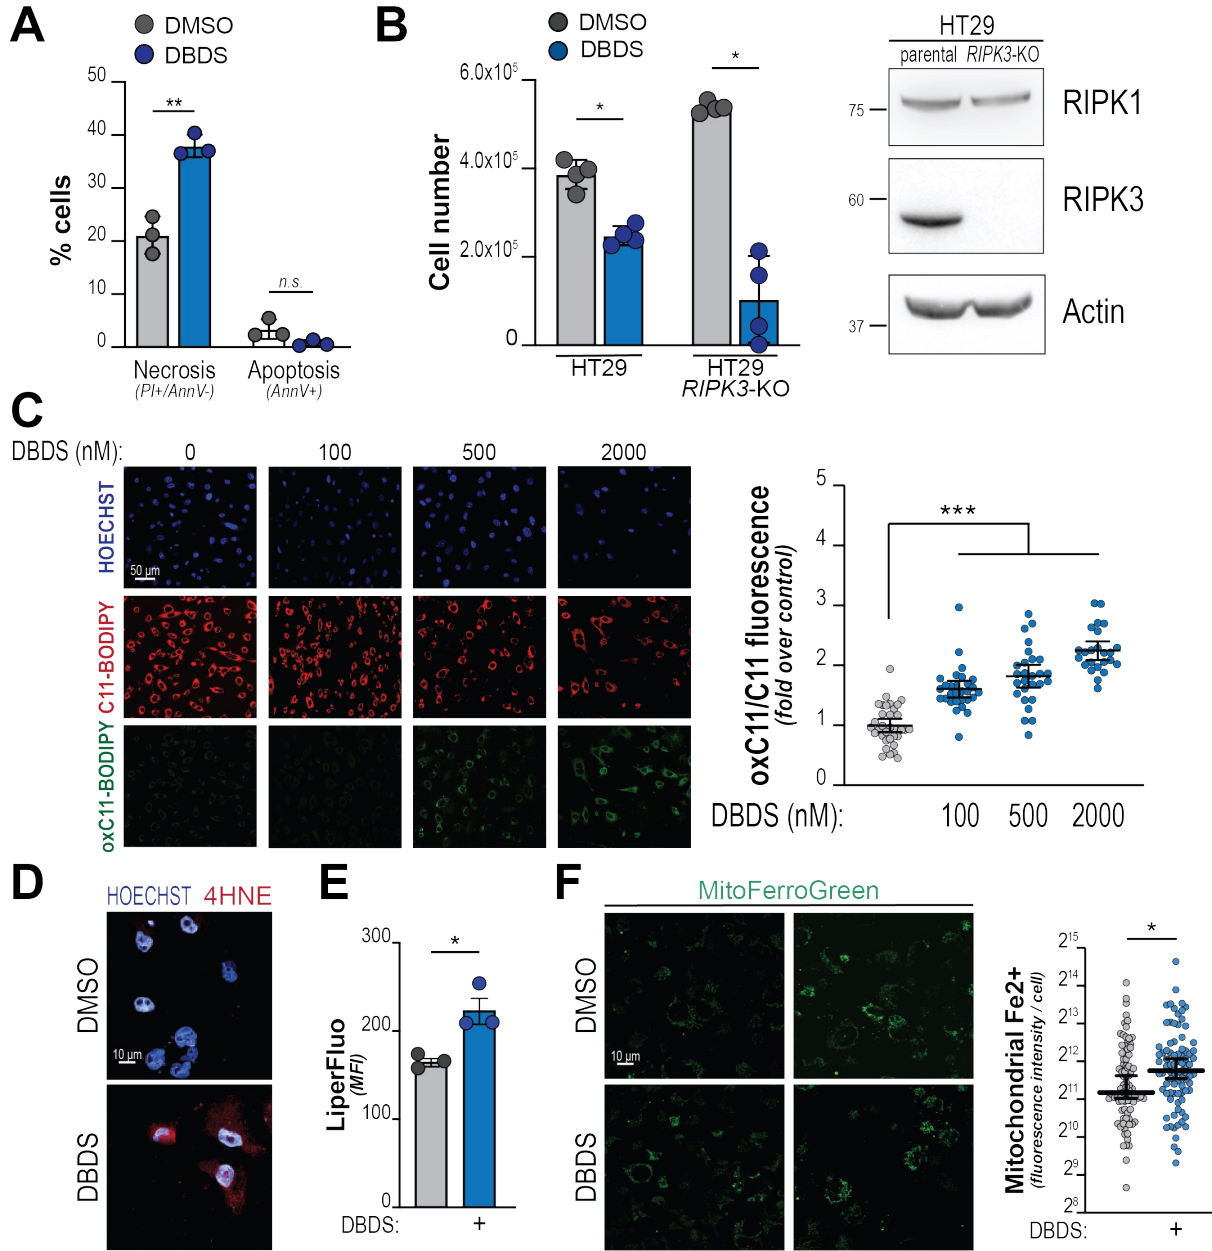

**Supplementary Figure 4. A**, KPC cells were treated with DBDS (5  $\mu$ M) or DMSO for 24 hours and stained for flow cytometry analysis. Graph shows percentage of gated cells. Necrotic cells are defined as PI-positive, Annexin V-negative; apoptotic cells are defined as PI- and Annexin V-double positive events. **B**, RIPK3-proficient (HT29) or -deficient (HT29 RIPK3-KO) clones were treated with DBDS (5  $\mu$ M) for 2 days and counted. Dots denote experimental replicates. Bars show mean,  $\pm$  SD (\*,  $P < 0.05$ ). On the right, western blotting confirming efficient RIPK3 ablation. **C**, KPC cells were treated with increasing concentrations of DBDS for 1 hour and subsequently incubated with C11-BODIPY for 15 minutes. Left, representative images. Right, quantification of red-to-green (indicative of lipid peroxidation) fluorescence shift. **D**, immunostaining of 4HNE (red) in KP4 cells treated with DBDS (5  $\mu$ M, for 24 hours). Nuclei were counterstained with HOECHST (blue). **E**, KP4 cells were treated with DBDS (10  $\mu$ M) for 50 minutes and stained with MitoFerroGreen to detect mitochondrial iron. Live images were acquired and fluorescence intensity quantified. Graph shows replicates  $\pm$  95% CI. For all panels: \*,  $P < 0.05$ ; \*\*,  $P < 0.01$ ; \*\*\*,  $P < 0.001$ ; calculated over vehicle-treated cells unless otherwise indicated.
